# Supplementary material for: Using proximal remote sensing in non-invasive phenotyping of invertebrates
Source: PLoS One. 2017 May 4;12(5):e0176392. doi: 10.1371/journal.pone.0176392 (PMC5417510; doi:10.1371/journal.pone.0176392)
Supplement: S3 Table — Fem: female; E70: preserved in 70% ethanol; B10-230: spectral band 10 to band 230. (XLS) [file pone.0176392.s003.xls]

## Sheet: aaa
SEX	Preserve Time(hours)	TRT	REP	B10	B11	B12	B13	B14	B15	B16	B17	B18	B19	B20	B21	B22	B23	B24	B25	B26	B27	B28	B29	B30	B31	B32	B33	B34	B35	B36	B37	B38	B39	B40	B41	B42	B43	B44	B45	B46	B47	B48	B49	B50	B51	B52	B53	B54	B55
Fem	2	E70	1	0.569674	0.587525	0.608662	0.626818	0.638563	0.644954	0.648886	0.655489	0.661167	0.664801	0.670456	0.674759	0.677859	0.681138	0.68109	0.683131	0.684452	0.687465	0.689132	0.691087	0.695072	0.696421	0.69905	0.702062	0.704404	0.707375	0.709667	0.712704	0.714386	0.717064	0.720453	0.721435	0.726124	0.727822	0.728775	0.73262	0.733455	0.736568	0.738384	0.739127	0.740975	0.742513	0.744315	0.744273	0.747584	0.747858
Fem	48	E70	1	0.387532	0.443374	0.504233	0.55793	0.606601	0.638972	0.657147	0.675746	0.689514	0.703139	0.714563	0.722706	0.728338	0.732597	0.732425	0.731228	0.729142	0.726884	0.726428	0.725781	0.729022	0.729636	0.732797	0.732461	0.733553	0.737195	0.733501	0.737566	0.736678	0.738971	0.740664	0.741343	0.747728	0.748167	0.752256	0.753406	0.755389	0.758645	0.759706	0.762875	0.764963	0.769268	0.768347	0.773447	0.774403	0.776021
Fem	336	E70	1	0.386279	0.44046	0.508263	0.567651	0.612301	0.642185	0.662409	0.678794	0.689285	0.698324	0.710482	0.716559	0.722986	0.720446	0.722883	0.716721	0.713465	0.709218	0.710077	0.711598	0.711727	0.710329	0.712953	0.713793	0.713195	0.713232	0.714471	0.711734	0.714001	0.71626	0.716705	0.717057	0.720486	0.722551	0.72538	0.725684	0.728548	0.730149	0.735893	0.734909	0.73733	0.738923	0.741723	0.746131	0.745686	0.744808
Fem	504	E70	1	0.352492	0.401826	0.455037	0.503629	0.548322	0.576757	0.592767	0.607787	0.615449	0.626781	0.637538	0.645361	0.649207	0.65025	0.649292	0.646615	0.644759	0.642042	0.642365	0.639436	0.639164	0.644166	0.643964	0.644868	0.645607	0.646289	0.646025	0.64619	0.647231	0.650355	0.651823	0.65333	0.654796	0.657939	0.664253	0.66485	0.667985	0.671607	0.672492	0.677966	0.67829	0.68047	0.683162	0.68523	0.686664	0.688062
Fem	672	E70	1	0.381292	0.427283	0.47875	0.532045	0.573284	0.603717	0.625298	0.637663	0.653085	0.671256	0.674655	0.686928	0.695875	0.698068	0.697389	0.697524	0.693174	0.693923	0.691032	0.691943	0.692656	0.697405	0.697413	0.699039	0.700996	0.704412	0.70137	0.704541	0.70529	0.711255	0.712201	0.71529	0.719424	0.721788	0.726813	0.731279	0.735349	0.740291	0.74181	0.747438	0.749847	0.754826	0.756472	0.760295	0.763342	0.764933
Fem	2	E70	2	0.552139	0.569	0.589212	0.603668	0.614138	0.623081	0.627494	0.63601	0.637952	0.64289	0.648128	0.650695	0.654927	0.657981	0.658817	0.659201	0.659745	0.662896	0.664186	0.668491	0.668762	0.675142	0.675874	0.677151	0.683448	0.685296	0.686058	0.687011	0.69268	0.694749	0.697622	0.699167	0.699902	0.703712	0.704558	0.70887	0.709901	0.712753	0.714895	0.715765	0.717669	0.719998	0.720391	0.722818	0.722537	0.72407
Fem	48	E70	2	0.36433	0.414894	0.470825	0.519317	0.56169	0.590573	0.607569	0.620102	0.63365	0.643782	0.65526	0.664986	0.668563	0.668834	0.668634	0.666773	0.665672	0.662375	0.662961	0.663736	0.663453	0.665059	0.665439	0.664576	0.66944	0.668538	0.668782	0.671346	0.67066	0.671554	0.676572	0.677797	0.680011	0.682888	0.682778	0.687833	0.689776	0.693643	0.696933	0.700508	0.702581	0.704198	0.706503	0.708939	0.710698	0.713727
Fem	168	E70	2	0.373949	0.42425	0.483208	0.53442	0.57997	0.610995	0.63263	0.646261	0.659651	0.674702	0.689587	0.700699	0.70857	0.714582	0.712614	0.7112	0.712701	0.711399	0.710742	0.713017	0.715399	0.719267	0.72157	0.725614	0.726797	0.728814	0.72967	0.732231	0.734334	0.736112	0.736997	0.740533	0.746395	0.751548	0.752736	0.755961	0.757823	0.760454	0.765448	0.766217	0.76804	0.773231	0.775659	0.778926	0.77993	0.782849
Fem	336	E70	2	0.391793	0.446816	0.506119	0.565842	0.60304	0.630569	0.648687	0.659314	0.670538	0.683177	0.689648	0.696404	0.700922	0.702488	0.70013	0.698684	0.692238	0.68849	0.689188	0.688652	0.689106	0.6874	0.688985	0.689718	0.690626	0.688748	0.690715	0.692156	0.69186	0.691218	0.693515	0.695134	0.696309	0.699409	0.700259	0.704345	0.704225	0.710924	0.712391	0.712795	0.715438	0.717377	0.718852	0.721672	0.723586	0.723724
Fem	504	E70	2	0.39971	0.458518	0.525369	0.5897	0.640261	0.672861	0.697386	0.715409	0.730796	0.743138	0.755286	0.764945	0.767373	0.772628	0.772121	0.767095	0.764158	0.760656	0.758962	0.757388	0.757826	0.760316	0.759914	0.759262	0.762021	0.762125	0.76221	0.76323	0.763207	0.766605	0.76477	0.766835	0.768591	0.77124	0.77308	0.774628	0.776736	0.779483	0.780613	0.783665	0.783259	0.785109	0.787488	0.787899	0.789469	0.789474
Fem	672	E70	2	0.365705	0.404716	0.454012	0.501041	0.536869	0.569335	0.587824	0.597063	0.61529	0.62683	0.63517	0.646134	0.650301	0.653121	0.654008	0.650903	0.649981	0.648713	0.647462	0.647996	0.646946	0.648215	0.650473	0.652162	0.652874	0.650335	0.657316	0.657527	0.658922	0.662162	0.663829	0.666843	0.669441	0.675387	0.679371	0.680973	0.687548	0.690684	0.698847	0.696937	0.702594	0.706181	0.712448	0.711183	0.718419	0.716538
Fem	2	E70	3	0.519105	0.535868	0.55532	0.56876	0.57946	0.583314	0.588501	0.591501	0.59685	0.600533	0.608333	0.609303	0.614829	0.616485	0.617528	0.616513	0.618606	0.620703	0.623514	0.627243	0.627795	0.634065	0.634906	0.637167	0.640488	0.643587	0.645915	0.64605	0.650048	0.651388	0.65639	0.65802	0.659826	0.662788	0.666343	0.668722	0.668871	0.672074	0.674749	0.677719	0.67808	0.679532	0.68172	0.683379	0.685892	0.685558
Fem	48	E70	3	0.373049	0.419812	0.479993	0.530813	0.573717	0.601854	0.619129	0.632856	0.643361	0.65468	0.664544	0.67537	0.68043	0.680926	0.684538	0.680498	0.676668	0.673265	0.672538	0.67479	0.674737	0.674734	0.676268	0.678984	0.678125	0.679858	0.680952	0.680142	0.681603	0.683315	0.686134	0.688044	0.687536	0.692989	0.695977	0.697614	0.700864	0.705076	0.705739	0.709287	0.712716	0.717657	0.717045	0.721162	0.724618	0.726602
Fem	168	E70	3	0.379673	0.431719	0.49206	0.55167	0.592431	0.62919	0.647739	0.660924	0.67359	0.687062	0.702652	0.711734	0.719318	0.719909	0.721575	0.71857	0.718551	0.717551	0.716946	0.716929	0.717837	0.720691	0.72375	0.725314	0.724945	0.726662	0.727231	0.730494	0.730926	0.734871	0.732785	0.736688	0.739297	0.743407	0.747054	0.749784	0.75161	0.755239	0.757537	0.759252	0.761252	0.76453	0.765056	0.767348	0.771228	0.772318
Fem	336	E70	3	0.398138	0.453058	0.514713	0.568693	0.610921	0.636038	0.652086	0.665224	0.674005	0.68068	0.693959	0.703178	0.707189	0.707131	0.703888	0.700089	0.692306	0.692415	0.686557	0.69031	0.68442	0.6897	0.689905	0.688292	0.688936	0.688865	0.689686	0.691265	0.690777	0.693194	0.6921	0.692587	0.698735	0.698612	0.699945	0.703997	0.707847	0.710719	0.710539	0.71256	0.717152	0.7191	0.720327	0.722329	0.725585	0.726499
Fem	504	E70	3	0.384925	0.441202	0.508316	0.573303	0.627028	0.660319	0.682578	0.700884	0.715259	0.729167	0.741642	0.753377	0.759759	0.761168	0.75892	0.75702	0.75285	0.750932	0.749434	0.748719	0.750087	0.750438	0.750577	0.752825	0.750689	0.752425	0.753642	0.75495	0.753835	0.754359	0.757197	0.757997	0.758142	0.761383	0.763096	0.764527	0.768372	0.768887	0.77232	0.776552	0.774995	0.77488	0.776684	0.777578	0.778425	0.780876
Fem	672	E70	3	0.353805	0.389971	0.433864	0.472922	0.50882	0.537687	0.553429	0.565959	0.572478	0.586424	0.593853	0.601874	0.609224	0.608803	0.609265	0.60764	0.604929	0.600941	0.599987	0.601957	0.602958	0.602197	0.605055	0.602551	0.607579	0.606502	0.610012	0.608274	0.612831	0.612746	0.616582	0.619289	0.625127	0.627654	0.633373	0.635776	0.638324	0.646267	0.652019	0.650967	0.656602	0.660865	0.662705	0.664694	0.669195	0.672775
Fem	2	E70	4	0.487391	0.500132	0.515506	0.526565	0.533039	0.54079	0.543208	0.549861	0.552113	0.559362	0.561256	0.566362	0.566905	0.571991	0.570929	0.575172	0.574473	0.575567	0.579404	0.581815	0.585143	0.588547	0.591839	0.596449	0.597671	0.601654	0.603274	0.604624	0.607978	0.610669	0.614442	0.6171	0.619652	0.623604	0.625637	0.628538	0.63274	0.635297	0.639822	0.639704	0.640751	0.645193	0.646044	0.647852	0.650941	0.65262
Fem	48	E70	4	0.384981	0.440001	0.509628	0.566432	0.613201	0.64521	0.666225	0.683859	0.693853	0.705881	0.718438	0.728971	0.73289	0.736954	0.737864	0.730792	0.730801	0.724407	0.726381	0.724881	0.725855	0.728118	0.726805	0.727599	0.73109	0.73127	0.729859	0.729406	0.730758	0.731602	0.733253	0.733573	0.7372	0.739296	0.740748	0.746485	0.749185	0.750959	0.751041	0.754992	0.756647	0.757474	0.758571	0.76287	0.764391	0.766973
Fem	168	E70	4	0.365417	0.41389	0.472953	0.528515	0.577015	0.602663	0.624734	0.641495	0.654043	0.667864	0.680526	0.687852	0.69536	0.699293	0.696919	0.695718	0.694667	0.693462	0.691906	0.692581	0.695797	0.696872	0.698202	0.701275	0.701602	0.704501	0.704832	0.705506	0.708275	0.70896	0.709912	0.71369	0.71741	0.718891	0.722547	0.727201	0.72945	0.731458	0.733967	0.737114	0.739718	0.742218	0.7446	0.747242	0.75064	0.751376
Fem	336	E70	4	0.404399	0.458911	0.527137	0.585762	0.631817	0.656766	0.676449	0.687219	0.700599	0.709743	0.721222	0.727923	0.731822	0.734385	0.730255	0.727733	0.722114	0.721615	0.719888	0.717422	0.718231	0.717455	0.718754	0.718844	0.719331	0.719086	0.719695	0.717501	0.720491	0.720438	0.721376	0.722877	0.726238	0.727544	0.730991	0.734179	0.734403	0.738402	0.740555	0.74341	0.744244	0.747753	0.750294	0.751841	0.752187	0.755847
Fem	504	E70	4	0.381937	0.435903	0.49989	0.563361	0.608798	0.642614	0.665605	0.681107	0.692407	0.70203	0.719043	0.728307	0.732814	0.736133	0.735705	0.732263	0.726479	0.72754	0.725445	0.724344	0.725411	0.724703	0.726661	0.727399	0.727894	0.728023	0.729424	0.73073	0.730192	0.732328	0.731694	0.73467	0.733875	0.738275	0.740355	0.742954	0.745163	0.747627	0.750049	0.751592	0.752504	0.755135	0.754889	0.758664	0.759466	0.759965
Fem	672	E70	4	0.334718	0.37302	0.415563	0.455551	0.491003	0.515652	0.535634	0.546911	0.558316	0.5649	0.5727	0.57983	0.588024	0.589538	0.587678	0.584402	0.584113	0.579587	0.580673	0.580647	0.581856	0.584787	0.582819	0.581644	0.582832	0.586019	0.58542	0.590555	0.590993	0.592445	0.593764	0.594645	0.603316	0.607121	0.614886	0.615151	0.620188	0.623904	0.628191	0.634391	0.63569	0.639762	0.645246	0.650211	0.653059	0.653884
Fem	2	E70	5	0.534239	0.551091	0.568758	0.582853	0.592064	0.597437	0.603963	0.608135	0.613361	0.620295	0.624275	0.630453	0.633092	0.635263	0.635895	0.636903	0.639465	0.641589	0.644147	0.647567	0.649584	0.653134	0.65711	0.659862	0.661508	0.664831	0.666815	0.669803	0.672066	0.67384	0.678807	0.678633	0.682145	0.68409	0.686692	0.690857	0.692081	0.693499	0.69671	0.698963	0.700934	0.700431	0.702964	0.705648	0.707072	0.707389
Fem	48	E70	5	0.391549	0.450627	0.518754	0.581725	0.630358	0.665817	0.687996	0.705654	0.720042	0.733043	0.745126	0.756137	0.760237	0.764857	0.766688	0.762191	0.758982	0.755787	0.753493	0.754214	0.756292	0.758913	0.757626	0.759927	0.760506	0.759706	0.762493	0.762184	0.764084	0.765562	0.766131	0.767404	0.768339	0.770327	0.772102	0.777273	0.77889	0.779981	0.784675	0.784663	0.786378	0.78999	0.789769	0.792931	0.795135	0.796424
Fem	168	E70	5	0.367254	0.419913	0.479861	0.536063	0.579614	0.612736	0.633078	0.646304	0.661274	0.676482	0.685732	0.696992	0.705601	0.706646	0.707433	0.7039	0.704382	0.701252	0.69996	0.699963	0.702364	0.70378	0.705511	0.706767	0.709551	0.712444	0.710649	0.714094	0.712185	0.714631	0.715126	0.718782	0.721999	0.724279	0.727762	0.730489	0.733538	0.736795	0.739716	0.742664	0.745565	0.746752	0.748398	0.750869	0.753712	0.756371
Fem	336	E70	5	0.412371	0.476083	0.550174	0.617436	0.673045	0.708303	0.731452	0.74386	0.759416	0.771275	0.783631	0.792943	0.797502	0.798551	0.794327	0.793262	0.788934	0.783101	0.781147	0.779428	0.778538	0.779779	0.781353	0.778456	0.780577	0.779315	0.779619	0.777102	0.776735	0.778474	0.777898	0.779827	0.781003	0.784373	0.785342	0.787548	0.788739	0.791621	0.793544	0.794863	0.796013	0.797761	0.800364	0.80103	0.801275	0.803464
Fem	504	E70	5	0.388627	0.440177	0.498168	0.554567	0.596786	0.629682	0.645972	0.662218	0.673595	0.680475	0.691126	0.700811	0.702731	0.706656	0.702827	0.698888	0.697743	0.696177	0.69252	0.693116	0.693703	0.695017	0.693637	0.695586	0.695771	0.697277	0.698558	0.696996	0.697284	0.69969	0.700939	0.702836	0.704806	0.707907	0.707622	0.714205	0.713508	0.716989	0.718334	0.722624	0.721914	0.725331	0.728522	0.729533	0.73124	0.733244
Fem	672	E70	5	0.389762	0.438112	0.493505	0.546998	0.593055	0.626123	0.644328	0.65646	0.673214	0.687407	0.695995	0.705688	0.714892	0.716159	0.712857	0.710833	0.709432	0.707849	0.706159	0.704392	0.708085	0.705489	0.708446	0.708542	0.710539	0.711354	0.715214	0.714293	0.716056	0.719159	0.719422	0.722564	0.725496	0.730069	0.734921	0.738702	0.743518	0.744318	0.748097	0.752767	0.754101	0.757469	0.760887	0.765503	0.769245	0.77039
Fem	2	E70	6	0.504962	0.524727	0.536368	0.547932	0.556305	0.562596	0.569948	0.570325	0.575652	0.581344	0.582959	0.589135	0.592184	0.597623	0.596893	0.598782	0.598077	0.598931	0.601377	0.603711	0.606477	0.611332	0.613079	0.615535	0.620869	0.621267	0.62408	0.62621	0.628044	0.631346	0.633669	0.638172	0.641526	0.643126	0.647525	0.649001	0.652105	0.652053	0.657986	0.660804	0.662274	0.664969	0.667816	0.668584	0.670774	0.672253
Fem	48	E70	6	0.367497	0.423589	0.488589	0.545576	0.594715	0.62674	0.643652	0.661381	0.673757	0.684457	0.699033	0.703917	0.710296	0.712647	0.711374	0.705364	0.703843	0.701345	0.701179	0.696861	0.698745	0.700894	0.701974	0.702542	0.704643	0.704669	0.702903	0.703269	0.705379	0.705566	0.706894	0.709723	0.711295	0.712983	0.717065	0.718603	0.721105	0.724815	0.724061	0.726406	0.731418	0.730306	0.732888	0.733831	0.736628	0.737412
Fem	168	E70	6	0.404287	0.463929	0.528363	0.594208	0.637187	0.675406	0.69726	0.711578	0.72674	0.74245	0.758825	0.767083	0.776606	0.778957	0.778225	0.77573	0.774795	0.775544	0.773861	0.772976	0.779004	0.776537	0.780735	0.781786	0.781907	0.785762	0.785894	0.786004	0.787793	0.790608	0.791152	0.793302	0.796062	0.797712	0.801545	0.803994	0.806907	0.808376	0.811471	0.813603	0.816907	0.817803	0.818658	0.821299	0.824425	0.825655
Fem	336	E70	6	0.410049	0.472055	0.540052	0.599889	0.656011	0.682948	0.702581	0.717442	0.725628	0.740409	0.750633	0.760029	0.764203	0.766886	0.762443	0.755371	0.753902	0.748558	0.745597	0.744768	0.742416	0.743686	0.745154	0.745023	0.746502	0.744132	0.74279	0.74446	0.740498	0.741748	0.744538	0.745177	0.745876	0.748598	0.751122	0.752637	0.755416	0.756483	0.759982	0.760276	0.763265	0.766945	0.768152	0.768705	0.77041	0.772035
Fem	504	E70	6	0.394595	0.451366	0.518278	0.58486	0.638366	0.6768	0.696459	0.715121	0.728382	0.743221	0.753459	0.764688	0.769879	0.77091	0.77024	0.767818	0.762748	0.75985	0.756039	0.757814	0.755787	0.75654	0.756434	0.756216	0.755443	0.756279	0.755415	0.756609	0.755146	0.758026	0.757041	0.757765	0.7597	0.762389	0.763401	0.766361	0.768939	0.767032	0.771312	0.771429	0.773789	0.774033	0.775841	0.775545	0.776379	0.778178
Fem	672	E70	6	0.389432	0.437313	0.489259	0.541847	0.585729	0.612522	0.633575	0.649083	0.664254	0.673512	0.686638	0.694498	0.70333	0.704439	0.701718	0.701245	0.698063	0.693315	0.693852	0.69474	0.692539	0.696166	0.695752	0.697527	0.700822	0.702224	0.702282	0.703227	0.703869	0.706252	0.71025	0.712954	0.716636	0.719629	0.723295	0.727123	0.731804	0.737719	0.739429	0.738979	0.745676	0.748398	0.751756	0.756429	0.758465	0.760551
Fem	2	E70	7	0.503604	0.518811	0.53235	0.544889	0.550864	0.559345	0.561436	0.566182	0.574764	0.580332	0.58522	0.586984	0.591765	0.593972	0.595963	0.593872	0.597865	0.597453	0.602313	0.602865	0.60715	0.609895	0.612668	0.615998	0.617611	0.621434	0.623843	0.627572	0.629598	0.632376	0.63687	0.63824	0.640032	0.641894	0.645115	0.648994	0.650504	0.654144	0.656874	0.657213	0.661507	0.664908	0.66505	0.667575	0.668812	0.671297
Fem	48	E70	7	0.376775	0.432861	0.502991	0.565436	0.620052	0.651508	0.672668	0.691966	0.704665	0.721257	0.734467	0.743454	0.749887	0.748305	0.746934	0.747969	0.74259	0.740797	0.738807	0.738721	0.740398	0.741276	0.742509	0.743795	0.742948	0.745958	0.745837	0.744617	0.746003	0.744614	0.745837	0.747197	0.751031	0.753466	0.755468	0.760146	0.761745	0.761788	0.765631	0.76678	0.769801	0.770631	0.772219	0.775103	0.776061	0.77858
Fem	168	E70	7	0.381877	0.43657	0.49944	0.561409	0.604855	0.639519	0.659547	0.676785	0.691214	0.705305	0.719865	0.729659	0.736156	0.737848	0.740333	0.739888	0.73666	0.734421	0.73748	0.73709	0.739797	0.740141	0.743096	0.74584	0.747415	0.749872	0.751179	0.75196	0.749799	0.753057	0.754389	0.757042	0.758791	0.761933	0.766365	0.767305	0.769181	0.7731	0.775691	0.780203	0.780065	0.783148	0.783786	0.784344	0.787185	0.790421
Fem	336	E70	7	0.40136	0.46165	0.530451	0.598909	0.647605	0.68184	0.70038	0.71693	0.728283	0.742294	0.755381	0.760772	0.764332	0.766609	0.764665	0.756959	0.75299	0.748343	0.7469	0.744958	0.743414	0.744612	0.743792	0.742403	0.743384	0.742942	0.741716	0.741349	0.739579	0.739663	0.740584	0.74207	0.744865	0.748682	0.747583	0.75027	0.75184	0.756062	0.75705	0.75831	0.760919	0.76127	0.764653	0.765598	0.767001	0.766465
Fem	504	E70	7	0.365497	0.417994	0.478914	0.53832	0.584094	0.620778	0.640982	0.653028	0.667749	0.677198	0.687475	0.697434	0.704309	0.706156	0.703963	0.703568	0.700618	0.69787	0.695221	0.692373	0.694528	0.6938	0.695539	0.695865	0.696384	0.696749	0.698293	0.697169	0.697723	0.698561	0.69838	0.700659	0.702923	0.705993	0.709228	0.711015	0.712904	0.714628	0.718626	0.71938	0.72278	0.724272	0.724624	0.72492	0.726738	0.729922
Fem	672	E70	7	0.405578	0.451459	0.501399	0.553395	0.595892	0.620246	0.637035	0.65002	0.663891	0.674952	0.684894	0.69394	0.6978	0.698759	0.70435	0.69718	0.697816	0.6933	0.690735	0.692583	0.692104	0.690793	0.692018	0.697819	0.69869	0.697747	0.699016	0.698147	0.700227	0.700315	0.705655	0.705554	0.711252	0.715847	0.716811	0.722159	0.725718	0.730732	0.736917	0.737589	0.74308	0.744843	0.749507	0.75237	0.755442	0.756423
Fem	2	E70	8	0.516566	0.528979	0.547662	0.558914	0.564365	0.570433	0.576153	0.58144	0.586029	0.590168	0.593882	0.596777	0.598243	0.603136	0.607196	0.608624	0.606164	0.609466	0.610376	0.613845	0.615035	0.619619	0.621266	0.622358	0.62535	0.627488	0.629858	0.634229	0.634297	0.637467	0.641214	0.64231	0.644277	0.647275	0.650325	0.652914	0.65378	0.657772	0.660571	0.661508	0.662583	0.664273	0.666652	0.667816	0.670112	0.673035
Fem	48	E70	8	0.365934	0.426272	0.491446	0.546097	0.59239	0.624441	0.64199	0.657031	0.670287	0.684057	0.694904	0.704814	0.708678	0.708074	0.708768	0.704203	0.699957	0.697597	0.696505	0.695595	0.696743	0.695808	0.699199	0.699448	0.700609	0.700705	0.69996	0.701724	0.701664	0.701437	0.704186	0.706154	0.707952	0.712701	0.713812	0.717775	0.719659	0.721605	0.725332	0.727632	0.72729	0.733227	0.733489	0.736252	0.737417	0.740785
Fem	168	E70	8	0.360459	0.407416	0.464981	0.521442	0.564616	0.594598	0.612254	0.62365	0.635408	0.652138	0.658898	0.671026	0.676115	0.678875	0.67944	0.678566	0.676137	0.677092	0.674038	0.676344	0.677063	0.676884	0.679037	0.683709	0.683246	0.683712	0.688457	0.687409	0.688718	0.69173	0.693421	0.695906	0.69733	0.70104	0.704096	0.707934	0.708486	0.711964	0.715136	0.720468	0.719961	0.721639	0.726491	0.728498	0.728523	0.730836
Fem	336	E70	8	0.413678	0.471234	0.541026	0.605261	0.657072	0.687747	0.70527	0.718825	0.734199	0.745776	0.755666	0.766754	0.768004	0.77088	0.767251	0.762263	0.759254	0.75489	0.751038	0.752322	0.75159	0.751735	0.751805	0.749735	0.750973	0.751624	0.751721	0.750204	0.751014	0.750744	0.75352	0.755793	0.756105	0.757883	0.759626	0.764478	0.763456	0.767406	0.772619	0.770671	0.77273	0.775799	0.776966	0.780374	0.782435	0.78447
Fem	504	E70	8	0.380716	0.436306	0.497269	0.557784	0.607941	0.643047	0.663878	0.674896	0.686716	0.698154	0.709563	0.717531	0.720575	0.722675	0.72155	0.717063	0.711016	0.708553	0.706417	0.706175	0.70502	0.705828	0.707108	0.708774	0.707782	0.705811	0.705825	0.705994	0.706855	0.706737	0.709017	0.711404	0.71054	0.714887	0.716284	0.717037	0.720385	0.719669	0.723882	0.727423	0.728577	0.728867	0.732109	0.732067	0.732568	0.733135
Fem	672	E70	8	0.368785	0.409656	0.458099	0.5069	0.546145	0.572419	0.590886	0.604446	0.618436	0.62982	0.637428	0.647778	0.65294	0.653678	0.654126	0.6506	0.651581	0.646942	0.645237	0.647258	0.647702	0.646687	0.648016	0.646148	0.65147	0.652204	0.653957	0.657726	0.656882	0.659315	0.663342	0.664001	0.669888	0.672948	0.676204	0.684747	0.686405	0.69076	0.696121	0.699788	0.700757	0.706454	0.711061	0.716137	0.717356	0.717329
Fem	48	E70	9	0.382802	0.443347	0.513162	0.581266	0.632404	0.666173	0.691299	0.709024	0.722687	0.735778	0.748852	0.758296	0.763153	0.767025	0.765312	0.761924	0.757569	0.755289	0.754015	0.752985	0.753727	0.753386	0.755833	0.756903	0.75763	0.75762	0.759293	0.757329	0.758167	0.758243	0.759171	0.760553	0.760502	0.764705	0.767476	0.76905	0.772141	0.774103	0.776957	0.777606	0.780661	0.78249	0.782899	0.784052	0.786609	0.788091
Fem	168	E70	9	0.390298	0.450605	0.518162	0.57947	0.629887	0.662353	0.68746	0.701746	0.720342	0.734389	0.751231	0.761435	0.76917	0.775845	0.775602	0.775248	0.775296	0.773982	0.775789	0.777903	0.776487	0.780212	0.783325	0.787203	0.790612	0.789699	0.790204	0.790565	0.791449	0.792698	0.794935	0.798708	0.799351	0.803286	0.804793	0.805196	0.806187	0.812873	0.812976	0.816156	0.818003	0.820208	0.817579	0.819169	0.821629	0.822148
Fem	336	E70	9	0.388474	0.44609	0.508966	0.567619	0.610353	0.639548	0.66026	0.67052	0.679286	0.691743	0.701532	0.708865	0.716405	0.717416	0.70927	0.709202	0.704503	0.701938	0.69772	0.696243	0.697588	0.696898	0.698414	0.700105	0.698793	0.701066	0.699483	0.700157	0.699408	0.700361	0.70117	0.703535	0.70657	0.708126	0.711552	0.713918	0.716827	0.719177	0.721219	0.72383	0.725337	0.726387	0.730649	0.733746	0.737241	0.73565
Fem	504	E70	9	0.40972	0.46499	0.537014	0.600707	0.653738	0.69168	0.712681	0.729708	0.745314	0.755091	0.76661	0.775269	0.782087	0.783105	0.781629	0.777745	0.772969	0.769282	0.765261	0.765606	0.764362	0.766188	0.769383	0.76698	0.767534	0.76763	0.766371	0.766541	0.766612	0.765657	0.766595	0.767753	0.76948	0.771542	0.773496	0.773394	0.777392	0.778594	0.780339	0.782623	0.781577	0.783908	0.782796	0.78615	0.787484	0.787273
Fem	672	E70	9	0.381318	0.427361	0.48744	0.535935	0.582768	0.615639	0.63003	0.644077	0.659721	0.668712	0.681365	0.691736	0.696324	0.696626	0.699491	0.694339	0.693038	0.69136	0.690634	0.688141	0.691495	0.690447	0.692009	0.691261	0.695598	0.695742	0.697007	0.698289	0.698504	0.701337	0.701067	0.704807	0.71038	0.71396	0.719453	0.720645	0.725152	0.730306	0.732283	0.733446	0.737868	0.741501	0.744418	0.748044	0.751454	0.7519
Fem	2	E70	10	0.524201	0.541005	0.55923	0.573698	0.584153	0.591715	0.596229	0.603056	0.611282	0.617587	0.625576	0.629936	0.633009	0.63743	0.63756	0.638807	0.639556	0.641448	0.646368	0.647246	0.65074	0.651249	0.65552	0.658146	0.661647	0.666242	0.666623	0.665329	0.672431	0.673824	0.677337	0.679815	0.682328	0.685641	0.686611	0.693234	0.694089	0.694403	0.698535	0.70139	0.702154	0.706502	0.707605	0.708984	0.710152	0.712399
Fem	48	E70	10	0.354373	0.411532	0.474025	0.533754	0.581473	0.612996	0.635931	0.647552	0.661917	0.677346	0.688669	0.700452	0.705673	0.705413	0.708136	0.704907	0.703529	0.702426	0.702165	0.69808	0.70096	0.703918	0.703513	0.704681	0.70529	0.707547	0.709139	0.707683	0.708749	0.710593	0.713931	0.714518	0.716053	0.718371	0.721058	0.722983	0.726717	0.729104	0.730007	0.732817	0.736918	0.738029	0.739188	0.741306	0.744116	0.746307
Fem	168	E70	10	0.366379	0.41871	0.482791	0.541174	0.589557	0.619853	0.638129	0.654312	0.67024	0.682139	0.697803	0.707118	0.715352	0.719739	0.721853	0.716592	0.715924	0.714402	0.715228	0.71774	0.720301	0.721014	0.724992	0.728743	0.731236	0.732538	0.733263	0.732894	0.736406	0.737492	0.7406	0.739403	0.743275	0.747097	0.749502	0.752975	0.755535	0.761441	0.762094	0.767491	0.766856	0.769657	0.771677	0.772796	0.77597	0.777511
Fem	336	E70	10	0.393116	0.445359	0.501355	0.557844	0.594896	0.623372	0.637367	0.649603	0.66221	0.670699	0.678956	0.685259	0.692417	0.689504	0.684741	0.680535	0.678477	0.672035	0.67148	0.668516	0.666228	0.668954	0.667311	0.668512	0.66887	0.668854	0.666846	0.669469	0.666645	0.670038	0.668784	0.671086	0.670187	0.674286	0.678905	0.682265	0.684081	0.684933	0.687813	0.693795	0.695425	0.695857	0.699196	0.701744	0.704262	0.708725
Fem	504	E70	10	0.37366	0.4251	0.484428	0.539406	0.583561	0.612722	0.63522	0.645438	0.657269	0.667502	0.678722	0.68321	0.689595	0.690793	0.688473	0.686937	0.68184	0.681906	0.675127	0.677712	0.67866	0.677837	0.679324	0.681275	0.679361	0.678872	0.679776	0.681338	0.680695	0.683028	0.682235	0.684576	0.687055	0.691943	0.691856	0.696389	0.697404	0.700227	0.702175	0.704798	0.706155	0.707338	0.709943	0.712543	0.714021	0.714363
Fem	672	E70	10	0.368183	0.409901	0.456999	0.507959	0.54591	0.573929	0.589845	0.604181	0.613865	0.623571	0.633735	0.64189	0.645937	0.647743	0.645256	0.647783	0.643169	0.637327	0.638008	0.635188	0.641144	0.638679	0.641083	0.643282	0.645247	0.64561	0.643089	0.646252	0.650415	0.654048	0.654135	0.658832	0.664086	0.666939	0.672692	0.674568	0.678865	0.683956	0.686282	0.69213	0.696617	0.700547	0.705014	0.706617	0.708381	0.712303
Fem	2	E70	11	0.487382	0.503234	0.520122	0.534611	0.54262	0.548453	0.552699	0.557737	0.561554	0.569193	0.57098	0.575669	0.578662	0.581569	0.581022	0.580801	0.579457	0.583014	0.586212	0.586016	0.58927	0.591823	0.593829	0.592994	0.598142	0.599865	0.600165	0.602736	0.605861	0.606769	0.610638	0.61255	0.615877	0.618247	0.620988	0.625707	0.626022	0.631786	0.633721	0.633587	0.636611	0.640528	0.643505	0.64554	0.645688	0.648763
Fem	48	E70	11	0.362644	0.419849	0.483639	0.544606	0.592615	0.625693	0.64295	0.659589	0.672448	0.687236	0.698587	0.707665	0.71487	0.715925	0.714106	0.710778	0.709626	0.707377	0.706223	0.704982	0.707286	0.707857	0.708844	0.709683	0.711187	0.709559	0.712053	0.714472	0.713658	0.715315	0.715028	0.714742	0.717521	0.723205	0.724969	0.729282	0.730089	0.734254	0.736631	0.739053	0.740789	0.741129	0.744032	0.746605	0.746831	0.749342
Fem	168	E70	11	0.416286	0.469272	0.531473	0.588396	0.630983	0.660615	0.679432	0.693572	0.706517	0.72454	0.734371	0.745382	0.751871	0.755267	0.754978	0.753839	0.75348	0.754593	0.751674	0.752027	0.75575	0.757321	0.761693	0.76228	0.762674	0.764901	0.76571	0.764675	0.768273	0.771268	0.771154	0.77289	0.774965	0.778129	0.782332	0.783484	0.787707	0.791032	0.791521	0.792394	0.79551	0.796764	0.798544	0.800073	0.801705	0.804142
Fem	336	E70	11	0.405734	0.463188	0.525107	0.584996	0.630367	0.658429	0.676947	0.69278	0.702624	0.716366	0.72177	0.729687	0.735169	0.73391	0.73246	0.730859	0.722945	0.71814	0.715753	0.714699	0.713524	0.713932	0.714047	0.715368	0.711766	0.714279	0.712175	0.712872	0.714715	0.71263	0.712618	0.715509	0.716543	0.719208	0.722509	0.72524	0.726051	0.73017	0.731703	0.732741	0.736796	0.735531	0.739816	0.742479	0.7447	0.746424
Fem	504	E70	11	0.391631	0.445313	0.510808	0.575652	0.62234	0.656246	0.677836	0.69036	0.702702	0.716041	0.726307	0.734915	0.742819	0.745532	0.741253	0.735955	0.735029	0.73157	0.729772	0.729436	0.729945	0.73004	0.730215	0.73174	0.728638	0.729431	0.730589	0.730844	0.730825	0.731243	0.731972	0.733538	0.73619	0.736521	0.738984	0.744012	0.744527	0.74579	0.749422	0.750648	0.752742	0.755368	0.753844	0.756552	0.760395	0.760865
Fem	672	E70	11	0.359045	0.39493	0.439709	0.483923	0.518464	0.544086	0.562212	0.573944	0.58254	0.597174	0.603616	0.611443	0.617237	0.618259	0.616021	0.61693	0.612306	0.612123	0.609196	0.610718	0.609418	0.611454	0.611328	0.611651	0.614866	0.614571	0.618217	0.618028	0.620187	0.623083	0.625827	0.629867	0.634505	0.641109	0.641079	0.646707	0.650822	0.656728	0.661908	0.664687	0.668586	0.672908	0.676585	0.681612	0.682853	0.687143
Fem	2	E70	12	0.482203	0.502421	0.520333	0.536372	0.547986	0.557223	0.560363	0.564298	0.569814	0.577243	0.580581	0.586738	0.590235	0.594719	0.595301	0.594581	0.596298	0.599235	0.599374	0.604352	0.60518	0.606267	0.61016	0.613038	0.615848	0.619202	0.621216	0.622647	0.628711	0.630365	0.631116	0.635871	0.638759	0.643456	0.645007	0.64653	0.651019	0.652827	0.657027	0.660833	0.66038	0.663629	0.664169	0.667688	0.671446	0.672378
Fem	48	E70	12	0.357215	0.41285	0.477773	0.539575	0.588006	0.622299	0.641783	0.657046	0.673238	0.688526	0.698799	0.708497	0.714724	0.719619	0.715842	0.716072	0.710872	0.710088	0.706966	0.712203	0.709174	0.711413	0.714622	0.714561	0.715992	0.716602	0.715872	0.717098	0.71739	0.71784	0.718734	0.720216	0.723337	0.726628	0.730349	0.730776	0.732537	0.735486	0.738827	0.740747	0.742275	0.744779	0.745398	0.746505	0.748141	0.750209
Fem	168	E70	12	0.362637	0.417795	0.476395	0.531853	0.577692	0.605242	0.624089	0.636023	0.651872	0.663124	0.678626	0.683212	0.693432	0.692661	0.691486	0.692163	0.68807	0.687381	0.685814	0.686641	0.687459	0.688048	0.691656	0.691432	0.693655	0.695611	0.696169	0.697423	0.697883	0.701038	0.700195	0.703382	0.705024	0.707805	0.712097	0.713358	0.717598	0.721956	0.722493	0.724503	0.727716	0.728462	0.729895	0.732211	0.733841	0.735749
Fem	336	E70	12	0.4079	0.462021	0.526435	0.587794	0.629874	0.658886	0.675862	0.689877	0.698438	0.709626	0.721359	0.728025	0.73003	0.733136	0.72821	0.725138	0.719979	0.719424	0.7136	0.711667	0.712193	0.711099	0.714445	0.711861	0.713495	0.71262	0.71004	0.711915	0.710749	0.712572	0.714874	0.715539	0.716262	0.718744	0.722189	0.725029	0.727479	0.728249	0.733523	0.735278	0.736775	0.738237	0.742676	0.744668	0.745587	0.748704
Fem	504	E70	12	0.386956	0.443076	0.506315	0.568692	0.616846	0.651369	0.672157	0.686148	0.694608	0.708901	0.717318	0.726648	0.732778	0.73245	0.731427	0.728302	0.72338	0.720281	0.717581	0.716853	0.716806	0.717469	0.718921	0.719619	0.720508	0.71899	0.718822	0.718756	0.720336	0.718807	0.719607	0.722433	0.724681	0.726037	0.727699	0.729423	0.732173	0.736643	0.736989	0.73726	0.740608	0.741808	0.743446	0.743632	0.747055	0.748827
Fem	672	E70	12	0.329292	0.367584	0.402359	0.436839	0.464478	0.487666	0.50317	0.512385	0.524206	0.531975	0.541395	0.545296	0.551272	0.552407	0.552386	0.549212	0.54754	0.545223	0.544798	0.543052	0.544842	0.544778	0.54724	0.546838	0.548951	0.549503	0.547529	0.554493	0.555539	0.555264	0.560044	0.563695	0.56701	0.571307	0.576646	0.580686	0.586331	0.592854	0.596674	0.600582	0.602717	0.609856	0.613897	0.619177	0.624065	0.624164
Fem	2	E70	13	0.527115	0.547035	0.563683	0.58274	0.593857	0.600969	0.605339	0.610682	0.615224	0.623028	0.627824	0.633495	0.633327	0.638339	0.63926	0.63763	0.640354	0.640742	0.643985	0.646788	0.650484	0.654482	0.656723	0.657898	0.663452	0.663793	0.667296	0.66983	0.672038	0.673164	0.676743	0.678271	0.681889	0.685331	0.688126	0.690813	0.69342	0.696161	0.696494	0.695671	0.702364	0.702559	0.702646	0.705624	0.707364	0.707321
Fem	48	E70	13	0.405258	0.457718	0.517894	0.569809	0.61726	0.642577	0.662974	0.673541	0.686881	0.698436	0.709416	0.718431	0.72369	0.723021	0.722213	0.718033	0.715289	0.714903	0.708667	0.711762	0.713116	0.712729	0.711819	0.714793	0.71361	0.715493	0.718344	0.716787	0.718133	0.7198	0.720305	0.723901	0.725297	0.728234	0.729213	0.731581	0.735709	0.737581	0.740331	0.742936	0.746501	0.749166	0.749376	0.752575	0.752369	0.755956
Fem	168	E70	13	0.412428	0.465025	0.531615	0.589104	0.636733	0.66627	0.68538	0.698167	0.715237	0.728119	0.741581	0.748676	0.755302	0.757183	0.758286	0.755364	0.751931	0.751513	0.749847	0.751919	0.750262	0.753647	0.756748	0.757451	0.758603	0.759434	0.761414	0.760603	0.762655	0.762607	0.765189	0.765876	0.768841	0.772351	0.774082	0.77666	0.779852	0.781667	0.785804	0.78595	0.787113	0.788803	0.791507	0.794824	0.795201	0.795744
Fem	336	E70	13	0.429579	0.491046	0.562517	0.625999	0.678267	0.707968	0.727479	0.739663	0.753874	0.767864	0.775485	0.784504	0.789183	0.790555	0.783093	0.781222	0.776374	0.772719	0.768155	0.767009	0.769365	0.766493	0.76567	0.768588	0.76916	0.768467	0.766644	0.76598	0.769596	0.767524	0.768464	0.769192	0.772325	0.773903	0.777211	0.778999	0.778961	0.782138	0.784151	0.785781	0.787806	0.789508	0.792347	0.792695	0.792086	0.796219
Fem	504	E70	13	0.378649	0.431064	0.487039	0.546307	0.59205	0.621321	0.640855	0.654235	0.666377	0.678944	0.690761	0.700389	0.70171	0.703636	0.705583	0.699628	0.697567	0.692983	0.690472	0.689872	0.690486	0.69199	0.691687	0.692806	0.69393	0.692107	0.693707	0.692276	0.695821	0.696352	0.697664	0.697298	0.699136	0.700539	0.703199	0.706591	0.707557	0.709645	0.712948	0.717026	0.71761	0.717887	0.7197	0.721246	0.72322	0.724678
Fem	672	E70	13	0.373796	0.417549	0.467792	0.518654	0.559455	0.588784	0.605853	0.619156	0.630097	0.64399	0.651458	0.661901	0.666794	0.669076	0.664514	0.666477	0.664149	0.658305	0.659135	0.657592	0.660258	0.660235	0.660288	0.661819	0.664321	0.663862	0.66505	0.664462	0.669175	0.669435	0.670944	0.673255	0.676845	0.681735	0.685541	0.689174	0.695156	0.698337	0.70227	0.703718	0.710079	0.711746	0.713888	0.719457	0.722512	0.723728
Fem	2	E70	14	0.459443	0.472053	0.491969	0.504013	0.510235	0.516237	0.519337	0.522642	0.5273	0.535888	0.539918	0.545403	0.547486	0.547606	0.548713	0.551445	0.552683	0.553717	0.557104	0.55743	0.560761	0.563727	0.566967	0.568622	0.572607	0.574616	0.577691	0.57874	0.58243	0.585116	0.590255	0.593274	0.59432	0.600464	0.601222	0.603286	0.608846	0.610916	0.615015	0.616764	0.618847	0.622333	0.623489	0.627468	0.631138	0.630481
Fem	48	E70	14	0.372335	0.418391	0.472495	0.522332	0.556849	0.583725	0.597847	0.609866	0.618335	0.625462	0.637863	0.64204	0.647164	0.64938	0.641753	0.638933	0.635474	0.633359	0.632214	0.630401	0.630668	0.630649	0.630522	0.635005	0.63402	0.633177	0.635148	0.638133	0.637919	0.637138	0.640435	0.645292	0.642994	0.64665	0.650103	0.652195	0.65709	0.660354	0.665173	0.66709	0.670839	0.673411	0.674493	0.677443	0.678932	0.68406
Fem	168	E70	14	0.396362	0.451931	0.516321	0.576091	0.62701	0.655963	0.674354	0.690785	0.703811	0.718159	0.728629	0.73909	0.744044	0.749016	0.749071	0.747107	0.742469	0.739705	0.739917	0.741158	0.741458	0.743271	0.746806	0.746833	0.74867	0.745976	0.74973	0.750574	0.750787	0.7521	0.752533	0.753157	0.756939	0.759905	0.762223	0.764393	0.767128	0.768831	0.771472	0.7734	0.775781	0.774981	0.777222	0.780339	0.781367	0.782304
Fem	336	E70	14	0.411772	0.467619	0.526277	0.581412	0.624597	0.644882	0.661355	0.67045	0.680627	0.688882	0.69987	0.702131	0.705247	0.70728	0.701668	0.699082	0.690893	0.686897	0.685648	0.684796	0.68314	0.684788	0.684124	0.682731	0.684091	0.684518	0.682277	0.682634	0.68398	0.685771	0.685027	0.6873	0.691885	0.69308	0.696034	0.696548	0.701617	0.703666	0.704365	0.711506	0.711094	0.71213	0.715834	0.718139	0.720015	0.723621
Fem	504	E70	14	0.361295	0.411687	0.466382	0.51899	0.56373	0.589657	0.608693	0.621886	0.631189	0.6446	0.65577	0.66296	0.669575	0.669213	0.667575	0.666488	0.6623	0.661213	0.658457	0.659253	0.657807	0.659989	0.661309	0.662332	0.662773	0.662673	0.66153	0.665139	0.664405	0.665047	0.667417	0.668165	0.672177	0.67601	0.6774	0.680658	0.681678	0.6839	0.686179	0.689829	0.691245	0.694054	0.695772	0.697323	0.700895	0.70088
Fem	672	E70	14	0.407635	0.447927	0.506007	0.553294	0.594714	0.623461	0.644262	0.658042	0.668609	0.67841	0.686659	0.697121	0.703831	0.704417	0.703839	0.706041	0.698012	0.696046	0.695734	0.696525	0.697758	0.696972	0.701122	0.701357	0.702176	0.701477	0.70264	0.701464	0.705423	0.708973	0.708739	0.713797	0.716878	0.723056	0.728062	0.729039	0.733246	0.737516	0.742143	0.746909	0.746416	0.753815	0.756365	0.758646	0.763239	0.765447
Fem	2	E70	15	0.486723	0.506461	0.520589	0.538507	0.546677	0.555977	0.559226	0.565035	0.566505	0.575114	0.577835	0.582288	0.585541	0.587507	0.588484	0.591529	0.590628	0.592507	0.595425	0.598221	0.598121	0.602822	0.606546	0.608434	0.611442	0.613676	0.615804	0.618849	0.622569	0.623743	0.627	0.629363	0.633375	0.636005	0.635688	0.640283	0.64442	0.646349	0.648607	0.651026	0.653301	0.659504	0.659651	0.662702	0.663596	0.666744
Fem	48	E70	15	0.38782	0.445925	0.507251	0.565234	0.61019	0.641113	0.658498	0.671971	0.684013	0.695031	0.70714	0.714371	0.716988	0.723166	0.718778	0.712268	0.710996	0.710205	0.704488	0.706255	0.707817	0.706416	0.708128	0.709584	0.708477	0.709231	0.71075	0.709607	0.710813	0.712278	0.713456	0.715514	0.717056	0.716489	0.722515	0.724369	0.725133	0.728068	0.731612	0.732864	0.73573	0.736919	0.740244	0.741379	0.744739	0.743218
Fem	168	E70	15	0.38489	0.442098	0.508624	0.567727	0.614745	0.64741	0.668891	0.684971	0.698884	0.715374	0.722397	0.73835	0.743734	0.748202	0.748581	0.745513	0.744975	0.744979	0.742503	0.743719	0.74728	0.749954	0.752641	0.75442	0.754561	0.758403	0.758463	0.758071	0.758459	0.764341	0.761805	0.763065	0.767263	0.769881	0.773831	0.773659	0.776926	0.780249	0.782037	0.78521	0.785906	0.787109	0.787742	0.791911	0.793091	0.795973
Fem	336	E70	15	0.399762	0.454773	0.513879	0.571418	0.613378	0.638601	0.655721	0.668234	0.676458	0.689885	0.696878	0.707896	0.708911	0.708734	0.705121	0.702554	0.698486	0.695706	0.690707	0.690949	0.691005	0.691617	0.691565	0.692255	0.691746	0.68942	0.691162	0.691637	0.692759	0.690808	0.692187	0.693676	0.697174	0.699803	0.702615	0.705462	0.70631	0.709645	0.710956	0.715456	0.716862	0.720203	0.722181	0.724946	0.725739	0.727244
Fem	504	E70	15	0.416292	0.475999	0.54248	0.610576	0.662864	0.700851	0.721035	0.737045	0.751405	0.761431	0.774028	0.783928	0.789231	0.788061	0.78939	0.785967	0.781123	0.776394	0.774154	0.771805	0.773203	0.77195	0.773053	0.772875	0.772691	0.773256	0.772094	0.772687	0.77114	0.772265	0.773674	0.774041	0.77701	0.779298	0.779672	0.779684	0.782669	0.784789	0.784316	0.787987	0.789467	0.789774	0.790848	0.790626	0.793874	0.794338
Fem	672	E70	15	0.350222	0.392323	0.436932	0.481206	0.513057	0.536825	0.557444	0.571228	0.579547	0.59057	0.597961	0.606905	0.611457	0.614307	0.613343	0.610304	0.606873	0.604705	0.605113	0.605447	0.609858	0.605896	0.605769	0.60727	0.608838	0.612015	0.615019	0.613574	0.617573	0.620594	0.62155	0.625725	0.627821	0.63299	0.637827	0.641768	0.647071	0.653415	0.656144	0.662481	0.664277	0.667485	0.674635	0.676356	0.679938	0.683738
Fem	2	E70	16	0.493087	0.510748	0.526705	0.54084	0.547052	0.556861	0.559899	0.562783	0.56898	0.573218	0.583337	0.584186	0.586856	0.588048	0.587973	0.589955	0.592527	0.595107	0.592724	0.59792	0.59962	0.604513	0.603957	0.606814	0.610166	0.613782	0.616673	0.620018	0.621885	0.62338	0.625453	0.628079	0.628799	0.635008	0.636667	0.63883	0.642743	0.64511	0.648982	0.649916	0.652948	0.654465	0.657636	0.660021	0.665231	0.66468
Fem	48	E70	16	0.370907	0.419778	0.48084	0.532613	0.577194	0.603017	0.622563	0.633655	0.648726	0.658872	0.668565	0.677159	0.68235	0.685575	0.683746	0.679809	0.675236	0.671639	0.671789	0.668762	0.670077	0.670475	0.673475	0.672548	0.676586	0.675282	0.676157	0.676073	0.678005	0.679607	0.678923	0.681043	0.684511	0.687867	0.69104	0.693061	0.698658	0.700572	0.702772	0.70433	0.705955	0.709389	0.713007	0.714626	0.716517	0.719725
Fem	168	E70	16	0.383738	0.438999	0.503288	0.563164	0.610877	0.643723	0.663057	0.678158	0.692105	0.705647	0.721705	0.729842	0.739066	0.739844	0.740357	0.739524	0.7369	0.734745	0.733166	0.73361	0.73736	0.736275	0.738526	0.740319	0.743449	0.743239	0.745696	0.745496	0.74698	0.748406	0.74922	0.750157	0.753823	0.755767	0.759469	0.760186	0.765312	0.766783	0.768083	0.771758	0.770565	0.773138	0.774645	0.777682	0.777722	0.779887
Fem	336	E70	16	0.410662	0.463809	0.517707	0.570161	0.611309	0.6406	0.659564	0.668202	0.681057	0.694397	0.707624	0.712189	0.715023	0.716583	0.713361	0.707059	0.702814	0.70144	0.695721	0.69587	0.696478	0.69544	0.696857	0.695748	0.693035	0.696793	0.697349	0.696041	0.694839	0.696704	0.696196	0.700961	0.702128	0.706108	0.708289	0.710961	0.711074	0.71822	0.719624	0.720278	0.722819	0.726071	0.7278	0.730841	0.729939	0.732768
Fem	504	E70	16	0.408299	0.468575	0.537027	0.602383	0.655546	0.690752	0.711957	0.72861	0.745069	0.756521	0.767788	0.778094	0.782533	0.786716	0.781024	0.777413	0.772424	0.767231	0.766156	0.764531	0.763634	0.764036	0.765318	0.762809	0.764298	0.764132	0.761285	0.76135	0.760549	0.760428	0.763009	0.764064	0.763434	0.766004	0.767999	0.767761	0.771414	0.772925	0.772964	0.775959	0.77716	0.77732	0.778358	0.780332	0.781548	0.78276
Fem	672	E70	16	0.40297	0.454572	0.512471	0.568745	0.615297	0.643588	0.666915	0.680274	0.694825	0.705905	0.717552	0.729626	0.735203	0.73683	0.732722	0.734498	0.730578	0.729836	0.726062	0.726038	0.726443	0.727398	0.727153	0.730662	0.73309	0.732131	0.734054	0.736304	0.738054	0.739355	0.740289	0.742221	0.745247	0.747035	0.752497	0.756103	0.759407	0.762711	0.766407	0.769075	0.772043	0.775865	0.776453	0.780852	0.782343	0.783903
Fem	2	E70	17	0.503572	0.516542	0.533974	0.543012	0.551609	0.560194	0.562856	0.565129	0.572172	0.578204	0.582635	0.582269	0.588048	0.589988	0.594131	0.592973	0.595299	0.597679	0.600809	0.602192	0.606683	0.611293	0.613425	0.613253	0.619146	0.62231	0.623605	0.627714	0.630969	0.631707	0.636697	0.638671	0.643974	0.644605	0.648611	0.648464	0.651872	0.656596	0.65937	0.658773	0.66257	0.661873	0.667008	0.667381	0.667136	0.670411
Fem	48	E70	17	0.386103	0.444169	0.51125	0.569756	0.618439	0.650301	0.670187	0.688115	0.701274	0.715765	0.724462	0.733797	0.742112	0.746072	0.747278	0.742323	0.740024	0.736215	0.733452	0.734006	0.736354	0.737659	0.737853	0.739597	0.743974	0.741466	0.742098	0.742549	0.745283	0.743895	0.747591	0.749016	0.751514	0.753349	0.757885	0.757744	0.761007	0.764612	0.767871	0.769453	0.77278	0.774003	0.776687	0.77754	0.777787	0.78138
Fem	336	E70	17	0.428068	0.485582	0.552762	0.61281	0.659454	0.690383	0.703732	0.717827	0.731633	0.739726	0.751414	0.763739	0.764953	0.764014	0.758322	0.752178	0.751568	0.746819	0.744678	0.740491	0.740586	0.738126	0.739722	0.741113	0.7385	0.73919	0.736238	0.738034	0.737709	0.735092	0.73901	0.736848	0.740392	0.744851	0.745539	0.746685	0.749032	0.755117	0.756049	0.755536	0.757218	0.762598	0.762492	0.765227	0.768757	0.769227
Fem	504	E70	17	0.390525	0.447489	0.504023	0.560407	0.607631	0.638116	0.652626	0.666657	0.6763	0.687241	0.695461	0.700834	0.706501	0.708336	0.704166	0.702967	0.701018	0.698903	0.695142	0.696889	0.696418	0.69942	0.699203	0.700721	0.700546	0.701025	0.699759	0.700918	0.701797	0.700958	0.702496	0.70652	0.707563	0.710377	0.709199	0.713299	0.717355	0.719979	0.721689	0.724068	0.723912	0.727112	0.726266	0.726234	0.731337	0.732555
Fem	672	E70	17	0.360004	0.395274	0.437554	0.483275	0.517694	0.542744	0.556872	0.569364	0.582265	0.592721	0.599922	0.608379	0.614784	0.613708	0.613296	0.610872	0.614029	0.606291	0.601197	0.604616	0.606745	0.606378	0.606118	0.60901	0.610095	0.608741	0.61327	0.615972	0.617204	0.621673	0.6229	0.623423	0.628519	0.633515	0.637249	0.643969	0.648118	0.653203	0.658765	0.662868	0.668262	0.669733	0.673876	0.679295	0.684447	0.68595
Fem	2	E70	18	0.50744	0.522117	0.536997	0.549543	0.560241	0.56664	0.567571	0.569551	0.577017	0.584353	0.587039	0.589688	0.592458	0.595807	0.600991	0.599271	0.603044	0.603561	0.603197	0.606978	0.611767	0.613833	0.616057	0.6199	0.621882	0.625443	0.627164	0.631498	0.63339	0.634446	0.640013	0.639368	0.643288	0.647375	0.648883	0.652766	0.65483	0.659744	0.660966	0.663504	0.666001	0.667981	0.671355	0.673503	0.678447	0.678241
Fem	48	E70	18	0.380604	0.441637	0.507742	0.564946	0.617493	0.646181	0.666716	0.683751	0.693643	0.710155	0.719508	0.729506	0.737353	0.738935	0.736206	0.731826	0.731655	0.727741	0.726349	0.725253	0.725704	0.726641	0.726937	0.729891	0.730442	0.730793	0.72908	0.730355	0.733196	0.732135	0.734054	0.734776	0.739248	0.739612	0.742951	0.745175	0.747469	0.748116	0.752897	0.754895	0.757778	0.757505	0.758964	0.760372	0.760805	0.763453
Fem	504	E70	18	0.412946	0.471452	0.536722	0.599873	0.648228	0.68282	0.701845	0.717424	0.730767	0.744893	0.751725	0.760134	0.764584	0.767543	0.763983	0.759155	0.757198	0.753612	0.752668	0.749911	0.74961	0.750422	0.74936	0.751465	0.748473	0.750606	0.750663	0.750306	0.75161	0.751205	0.751888	0.753811	0.753477	0.757529	0.755481	0.762151	0.762426	0.763343	0.76676	0.769135	0.770241	0.771425	0.772875	0.773984	0.779155	0.776271
Fem	672	E70	18	0.392585	0.441453	0.498401	0.545999	0.589499	0.616016	0.637018	0.649099	0.663883	0.676432	0.685458	0.694473	0.697672	0.699314	0.699967	0.699093	0.694828	0.688755	0.691742	0.690419	0.690228	0.695621	0.697866	0.695724	0.695404	0.700655	0.700061	0.70033	0.702048	0.704017	0.706982	0.709331	0.714392	0.719286	0.720872	0.7254	0.728635	0.735271	0.739124	0.742583	0.747975	0.74989	0.752734	0.756169	0.75806	0.761803
Fem	2	E70	19	0.458809	0.473061	0.487467	0.500695	0.510504	0.516459	0.522044	0.525605	0.530002	0.53776	0.539135	0.544053	0.549136	0.553448	0.556741	0.558415	0.556057	0.559287	0.559809	0.563515	0.566939	0.569543	0.571485	0.577347	0.579263	0.58083	0.58203	0.587152	0.588347	0.592847	0.594684	0.598509	0.602737	0.602834	0.60731	0.611629	0.613455	0.618755	0.620466	0.622302	0.627743	0.627322	0.632156	0.634423	0.635473	0.639419
Fem	48	E70	19	0.382881	0.440669	0.505746	0.564085	0.6147	0.643031	0.661861	0.678975	0.686529	0.703077	0.714333	0.724689	0.730479	0.729132	0.729329	0.725259	0.723281	0.718147	0.719376	0.717803	0.71797	0.718082	0.720142	0.7201	0.724683	0.722433	0.72372	0.721798	0.72318	0.722307	0.725021	0.726732	0.728627	0.730749	0.734213	0.736372	0.738208	0.741856	0.743853	0.745785	0.747635	0.748308	0.750682	0.753507	0.755056	0.757974
Fem	504	E70	19	0.397888	0.454002	0.513176	0.570317	0.615614	0.644687	0.664032	0.677969	0.688747	0.700564	0.711978	0.720478	0.722257	0.726146	0.723767	0.721826	0.718367	0.71568	0.715329	0.715773	0.715809	0.715478	0.716249	0.717684	0.720685	0.718165	0.719132	0.720185	0.719138	0.721648	0.722063	0.723403	0.726738	0.729048	0.730777	0.734122	0.734134	0.738113	0.741627	0.743208	0.743671	0.745928	0.746703	0.749026	0.74941	0.753015
Fem	672	E70	19	0.353902	0.393255	0.444815	0.490626	0.527398	0.555184	0.572059	0.586171	0.597564	0.607761	0.615144	0.62184	0.627537	0.62985	0.626604	0.625663	0.622496	0.62054	0.616702	0.619647	0.619422	0.620587	0.620456	0.62376	0.626985	0.622644	0.625351	0.629705	0.63009	0.632932	0.634272	0.636039	0.641424	0.646953	0.652684	0.653127	0.657669	0.66485	0.670804	0.673038	0.678296	0.682072	0.686698	0.688327	0.693612	0.693004
Fem	2	E70	20	0.521491	0.537687	0.557497	0.568929	0.576817	0.582813	0.587606	0.592995	0.599042	0.60196	0.60698	0.614934	0.6149	0.617603	0.619789	0.620176	0.621401	0.622076	0.626572	0.626756	0.632331	0.633048	0.63684	0.641283	0.642995	0.645874	0.646766	0.651569	0.653718	0.655768	0.660579	0.661802	0.664499	0.670043	0.670128	0.671759	0.67501	0.678425	0.679965	0.680374	0.684965	0.684399	0.686302	0.689853	0.68895	0.69118
Fem	48	E70	20	0.377637	0.436127	0.499885	0.565225	0.615841	0.646035	0.668191	0.680465	0.69609	0.712212	0.719211	0.728559	0.736105	0.73828	0.73848	0.732588	0.731089	0.726418	0.725636	0.723106	0.724921	0.726022	0.727343	0.730521	0.72854	0.729868	0.730059	0.730659	0.73048	0.731577	0.733018	0.734079	0.735567	0.739284	0.742517	0.743406	0.745249	0.748553	0.751969	0.753032	0.754596	0.756976	0.759012	0.759836	0.761167	0.763423
Fem	504	E70	20	0.391343	0.442059	0.502411	0.557776	0.598814	0.627895	0.645482	0.657356	0.664465	0.675399	0.68471	0.690379	0.69422	0.694333	0.694017	0.692658	0.688645	0.685614	0.679501	0.679822	0.67965	0.679924	0.681579	0.682898	0.683091	0.682926	0.684788	0.683361	0.682012	0.681587	0.686567	0.686092	0.688615	0.689887	0.693421	0.696442	0.698283	0.700191	0.70357	0.708592	0.708948	0.710409	0.713816	0.714258	0.717183	0.719329
Fem	672	E70	20	0.369593	0.413862	0.465542	0.516682	0.553047	0.582902	0.599153	0.609891	0.620389	0.631757	0.646508	0.651501	0.65973	0.658756	0.656752	0.653262	0.652475	0.64908	0.64824	0.647967	0.646977	0.647291	0.652644	0.6518	0.653276	0.652897	0.654616	0.654928	0.657221	0.660425	0.663483	0.665767	0.66961	0.675373	0.678927	0.679181	0.685647	0.689792	0.695798	0.697857	0.703035	0.705042	0.711682	0.715531	0.716974	0.716906
Fem	2	E70	21	0.527196	0.546041	0.562815	0.583001	0.595097	0.600317	0.605387	0.611283	0.617391	0.621961	0.627454	0.630976	0.634261	0.638335	0.641287	0.641022	0.641735	0.644423	0.647025	0.649881	0.649919	0.654896	0.656384	0.658251	0.662616	0.665922	0.667626	0.668319	0.670832	0.675576	0.676608	0.678855	0.68287	0.68521	0.689532	0.68933	0.693013	0.696021	0.695993	0.699813	0.702101	0.704055	0.703596	0.705154	0.708791	0.710654
Fem	48	E70	21	0.363911	0.416403	0.48073	0.542436	0.59117	0.622108	0.641481	0.654999	0.667675	0.679516	0.695448	0.702616	0.708543	0.708052	0.709225	0.704109	0.70077	0.700138	0.697194	0.696871	0.698188	0.698594	0.70061	0.699969	0.699588	0.701419	0.703397	0.704175	0.703429	0.705239	0.705745	0.707725	0.709017	0.71387	0.714043	0.718676	0.720794	0.72278	0.726261	0.728129	0.730316	0.731725	0.733015	0.734911	0.736464	0.73761
Fem	504	E70	21	0.379787	0.426581	0.483765	0.53688	0.57732	0.608031	0.628225	0.638272	0.650733	0.661037	0.672798	0.681055	0.684831	0.683566	0.683548	0.680356	0.677572	0.674424	0.672125	0.671308	0.671594	0.669464	0.673441	0.674086	0.672806	0.674325	0.674535	0.673231	0.674883	0.67531	0.676761	0.67754	0.680402	0.681586	0.684417	0.688046	0.689579	0.692163	0.693927	0.695959	0.698277	0.699084	0.702908	0.704422	0.706204	0.709435
Fem	672	E70	21	0.367443	0.40312	0.447192	0.489959	0.528316	0.551409	0.566819	0.579204	0.590718	0.597799	0.606606	0.614	0.62083	0.618854	0.61738	0.616654	0.614858	0.613861	0.608017	0.608294	0.609845	0.608792	0.610902	0.612545	0.61476	0.615968	0.614139	0.616867	0.621171	0.622176	0.624319	0.629138	0.633526	0.637926	0.641387	0.646164	0.651932	0.657774	0.660784	0.665634	0.665563	0.673039	0.67795	0.677209	0.68507	0.684866
Fem	48	E70	22	0.353037	0.408596	0.472927	0.532231	0.58152	0.616409	0.638035	0.653491	0.667606	0.681906	0.696286	0.702094	0.709288	0.713215	0.713646	0.710132	0.707236	0.703465	0.705572	0.706037	0.704521	0.708388	0.709888	0.711477	0.70959	0.710681	0.711495	0.713704	0.713606	0.714768	0.716834	0.717928	0.719749	0.723598	0.725663	0.727684	0.72992	0.733755	0.735883	0.73672	0.737999	0.740735	0.742755	0.743378	0.744215	0.74744
Fem	504	E70	22	0.399034	0.449096	0.51292	0.570259	0.613482	0.648562	0.667318	0.680681	0.69039	0.70373	0.71469	0.722488	0.729607	0.732172	0.726274	0.726603	0.724052	0.717938	0.716171	0.716628	0.716157	0.71718	0.718024	0.717617	0.716702	0.717091	0.717666	0.717929	0.716387	0.718322	0.717689	0.718786	0.72006	0.721891	0.725592	0.726877	0.730066	0.730556	0.732748	0.734508	0.734121	0.735917	0.738142	0.73924	0.740203	0.740777
Fem	672	E70	22	0.383992	0.424208	0.473265	0.516808	0.55742	0.584729	0.598965	0.612157	0.622484	0.632269	0.644511	0.652661	0.65598	0.659766	0.658078	0.65501	0.653087	0.650125	0.651056	0.647671	0.652518	0.651044	0.652034	0.650139	0.652841	0.653893	0.653391	0.658353	0.660292	0.657076	0.65934	0.661958	0.665984	0.674833	0.676754	0.680071	0.685229	0.688407	0.694301	0.694742	0.699389	0.702085	0.706277	0.70687	0.711798	0.714944
Fem	48	E70	23	0.342865	0.392026	0.453488	0.510068	0.557866	0.586411	0.60773	0.622692	0.633141	0.647687	0.659765	0.667222	0.670034	0.6746	0.669386	0.669644	0.667836	0.663302	0.665336	0.663504	0.664855	0.666871	0.668642	0.670274	0.669852	0.671866	0.670788	0.672738	0.672512	0.673891	0.67457	0.675649	0.679122	0.681053	0.684436	0.688499	0.690421	0.691511	0.695765	0.696575	0.701424	0.70287	0.70453	0.707408	0.708414	0.710675
Fem	504	E70	23	0.39781	0.445461	0.505954	0.555859	0.597179	0.625002	0.64666	0.654052	0.665885	0.671238	0.683044	0.687894	0.692594	0.695036	0.690638	0.687785	0.684548	0.681727	0.678837	0.678879	0.67685	0.677624	0.678285	0.678824	0.676367	0.678816	0.675956	0.67476	0.674989	0.675776	0.677265	0.679055	0.679418	0.681184	0.683529	0.68545	0.686258	0.687738	0.691963	0.694419	0.694251	0.694925	0.697321	0.698292	0.699408	0.701188
Fem	672	E70	23	0.387668	0.436262	0.487369	0.541012	0.581838	0.611713	0.627656	0.638588	0.654722	0.667333	0.677444	0.684482	0.688534	0.688795	0.688095	0.686521	0.683998	0.679215	0.678191	0.678757	0.681393	0.679663	0.679122	0.680171	0.680074	0.684147	0.68309	0.684994	0.684897	0.688932	0.688949	0.691526	0.697617	0.698613	0.702055	0.705257	0.712066	0.714008	0.717346	0.720597	0.724405	0.725444	0.730042	0.730758	0.736498	0.737346
Fem	48	E70	24	0.389764	0.442397	0.507154	0.569935	0.616739	0.644278	0.663387	0.678044	0.692223	0.705363	0.716759	0.728564	0.733364	0.735149	0.733562	0.727565	0.728866	0.726065	0.722939	0.721497	0.724026	0.725702	0.724883	0.727693	0.729116	0.729496	0.729744	0.728498	0.730506	0.731971	0.732919	0.733146	0.735218	0.740038	0.741465	0.743606	0.748341	0.748667	0.753134	0.754901	0.758968	0.758314	0.760763	0.763025	0.764547	0.765289
Fem	504	E70	24	0.362936	0.401463	0.449983	0.499113	0.532098	0.553326	0.570297	0.579916	0.587363	0.59666	0.60664	0.610264	0.613818	0.618451	0.613691	0.613295	0.608716	0.609629	0.604908	0.604937	0.604887	0.605868	0.607717	0.608084	0.609558	0.609937	0.610718	0.610317	0.612365	0.613159	0.614285	0.616829	0.618571	0.618198	0.623225	0.626059	0.626972	0.629375	0.631466	0.634884	0.636694	0.639049	0.639869	0.643297	0.644885	0.645667
Fem	672	E70	24	0.374274	0.411989	0.466581	0.512411	0.555215	0.580756	0.597738	0.612394	0.624733	0.635484	0.645213	0.656836	0.661405	0.662599	0.66036	0.659541	0.655051	0.652769	0.651786	0.65158	0.650262	0.65386	0.652382	0.653381	0.655517	0.655439	0.656091	0.659264	0.660265	0.661922	0.660812	0.665636	0.669699	0.674186	0.67748	0.681927	0.684648	0.688614	0.693488	0.695983	0.699676	0.703979	0.703871	0.708077	0.711704	0.71463
Fem	48	E70	25	0.396704	0.454348	0.523781	0.586797	0.634992	0.668677	0.692154	0.705474	0.718623	0.729232	0.740322	0.752407	0.757271	0.762121	0.759938	0.75545	0.750498	0.750911	0.74675	0.7478	0.748912	0.748914	0.749879	0.751991	0.754459	0.754735	0.754836	0.756666	0.756638	0.755731	0.757572	0.756793	0.76151	0.762824	0.765228	0.768804	0.770309	0.773704	0.774404	0.774909	0.778845	0.779059	0.781157	0.782235	0.784199	0.78563
Fem	48	E70	26	0.366711	0.422798	0.485452	0.54206	0.58603	0.61658	0.635112	0.649126	0.661042	0.676958	0.68522	0.693328	0.700198	0.704109	0.703461	0.700698	0.698282	0.697377	0.693357	0.693474	0.693567	0.696048	0.699527	0.698462	0.700592	0.70086	0.701687	0.703695	0.705016	0.704903	0.706578	0.708892	0.709735	0.712978	0.716841	0.719138	0.722323	0.724478	0.726709	0.730769	0.733247	0.734914	0.737609	0.736841	0.741964	0.742834
Fem	48	E70	27	0.365915	0.423316	0.484972	0.539346	0.581085	0.613679	0.634878	0.649984	0.659726	0.672895	0.685417	0.692065	0.699475	0.698901	0.701484	0.696707	0.693538	0.690904	0.691419	0.691738	0.691623	0.693416	0.693444	0.697156	0.695868	0.696864	0.697196	0.697503	0.70004	0.699853	0.701808	0.703512	0.705877	0.709562	0.711404	0.71694	0.720193	0.72182	0.721856	0.726715	0.729096	0.730444	0.733868	0.734237	0.735634	0.738162
Fem	48	E70	28	0.37347	0.433316	0.494307	0.553937	0.602452	0.631826	0.651259	0.667188	0.679787	0.69331	0.704367	0.712674	0.71742	0.720042	0.718071	0.715219	0.711215	0.708933	0.706967	0.706409	0.706139	0.708103	0.70833	0.709724	0.712621	0.712294	0.713191	0.712145	0.71264	0.714043	0.714411	0.716919	0.71996	0.721849	0.724844	0.728612	0.72992	0.73249	0.734812	0.736865	0.739154	0.74046	0.743229	0.744699	0.745596	0.74842
Fem	48	E70	29	0.387377	0.449781	0.522163	0.589337	0.639901	0.677785	0.699028	0.715485	0.728175	0.744165	0.757391	0.768234	0.773765	0.777077	0.774754	0.769836	0.768242	0.763527	0.761855	0.759781	0.762268	0.762656	0.763938	0.765384	0.765739	0.765341	0.767245	0.765497	0.767147	0.767069	0.768134	0.771228	0.770353	0.775177	0.775801	0.777572	0.780353	0.781193	0.784277	0.785567	0.787964	0.789706	0.790261	0.792006	0.793065	0.794091
Fem	48	E70	30	0.36231	0.420496	0.489771	0.554062	0.60534	0.638497	0.661667	0.674682	0.689752	0.70361	0.717085	0.727259	0.733049	0.733238	0.730158	0.727743	0.725278	0.721039	0.72009	0.719382	0.717928	0.721147	0.722315	0.722852	0.72192	0.724826	0.724047	0.724919	0.72328	0.724977	0.725905	0.726305	0.728689	0.730264	0.734806	0.737252	0.739691	0.741942	0.742453	0.745145	0.745812	0.748714	0.74943	0.752837	0.751665	0.752991
Fem	48	E70	31	0.339609	0.391391	0.45486	0.512653	0.55692	0.587306	0.607987	0.620428	0.632781	0.644878	0.658235	0.666644	0.673867	0.671664	0.669447	0.668753	0.663139	0.659102	0.658061	0.655919	0.65913	0.660432	0.659259	0.662162	0.662437	0.661656	0.661234	0.662736	0.663846	0.665261	0.665279	0.668147	0.670214	0.671616	0.674383	0.67924	0.681117	0.684016	0.68726	0.691874	0.691589	0.694398	0.697704	0.698308	0.700887	0.701835
Fem	48	E70	32	0.399195	0.44673	0.496732	0.550669	0.589251	0.617241	0.63841	0.646964	0.66116	0.673677	0.682989	0.690982	0.695477	0.697655	0.698144	0.69636	0.692938	0.690976	0.690929	0.689969	0.691935	0.694745	0.694058	0.696084	0.69748	0.699136	0.697844	0.70001	0.702465	0.705148	0.706249	0.709382	0.712658	0.714615	0.715921	0.719865	0.723244	0.726709	0.729362	0.732611	0.734292	0.736397	0.741056	0.743586	0.746519	0.747554
Fem	48	E70	33	0.438037	0.500803	0.572065	0.634909	0.687082	0.719998	0.744109	0.755824	0.770576	0.78545	0.798143	0.808515	0.815089	0.816179	0.817988	0.812639	0.811812	0.808958	0.806046	0.808825	0.809396	0.809509	0.810406	0.812638	0.813683	0.815857	0.812952	0.815142	0.814321	0.815566	0.819248	0.818812	0.8199	0.824134	0.823145	0.826093	0.830018	0.831383	0.833552	0.835723	0.838083	0.837946	0.840866	0.84152	0.843907	0.843705
Fem	48	E70	34	0.382306	0.436069	0.498519	0.559447	0.608344	0.638054	0.656136	0.670524	0.685323	0.696376	0.71073	0.718247	0.723625	0.724816	0.724542	0.72088	0.718485	0.716479	0.712969	0.716039	0.71698	0.715375	0.717143	0.718546	0.71974	0.719021	0.721	0.720207	0.721112	0.723316	0.722668	0.725507	0.727252	0.731272	0.733671	0.737067	0.741045	0.743139	0.745182	0.747134	0.749696	0.750935	0.753228	0.755617	0.758061	0.759815
Fem	48	E70	35	0.379291	0.441873	0.509423	0.570377	0.623497	0.656002	0.679455	0.692562	0.707889	0.719444	0.731567	0.741926	0.747096	0.750139	0.747135	0.743894	0.740226	0.736917	0.735791	0.734663	0.735453	0.737405	0.738457	0.739658	0.740002	0.74042	0.740837	0.74211	0.740593	0.740827	0.744207	0.744925	0.74785	0.750799	0.751857	0.754806	0.757404	0.760069	0.762601	0.765571	0.768172	0.768596	0.770816	0.772354	0.773398	0.774822
Fem	48	E70	36	0.392186	0.452302	0.522654	0.588074	0.63881	0.672297	0.69493	0.709239	0.725451	0.738244	0.752093	0.76159	0.767719	0.7695	0.769243	0.766678	0.763062	0.760093	0.759885	0.760544	0.759958	0.762456	0.763429	0.765454	0.765097	0.766917	0.765288	0.767067	0.767592	0.767866	0.770629	0.769632	0.77319	0.774834	0.778846	0.780512	0.782596	0.786087	0.78712	0.789102	0.791505	0.792421	0.794274	0.796501	0.798362	0.799286
[truncated: 175 more columns]
